# Supplementary material for: Identification of Functional Interactome of Gastric Cancer Cells with Helicobacter pylori Outer Membrane Protein HpaA by HPLC-MS/MS
Source: Biomed Res Int. 2020 Jun 5;2020:1052926. doi: 10.1155/2020/1052926 (PMC7293730; doi:10.1155/2020/1052926)
Supplement: Supplementary Materials — Figure S1: the CD spectrum of recombinant HpaA. [file 1052926.f1.zip]

Archive with 9 entries (6 files):
- Supplementary Material/
- Supplementary Material/.DS_Store
- __MACOSX/
- __MACOSX/Supplementary Material/
- __MACOSX/Supplementary Material/._.DS_Store
- Supplementary Material/Figure S1.tif
- __MACOSX/Supplementary Material/._Figure S1.tif
- Supplementary Material/~$GURE S1.docx
- __MACOSX/Supplementary Material/._~$GURE S1.docx
